# Supplementary material for: d-β-Hydroxybutyrate and melatonin for treatment of porcine hemorrhagic shock and injury: a melatonin dose-ranging study
Source: PubMed Central journal article supplement (PMC5707828; doi:10.1186/s13104-017-2975-0), 2017-11-29
Supplement: 13104_2017_2975_MOESM2_ESM.pdf [file 13104_2017_2975_MOESM2_ESM.pdf]

| Parameter                             | Baseline      | S 45min       | R 1hr         | FR 2hr        | FR 20hr       | PR 24hr | Effects       |
|---------------------------------------|---------------|---------------|---------------|---------------|---------------|---------|---------------|
| <b>Mean Arterial Pressure [mm Hg]</b> |               |               |               |               |               |         |               |
| LR                                    | 88 (82-94)    | 41 (35-47)    | 58 (52-64)    | 74 (67-80)    | 68 (61-76)    |         | G 0.0071      |
| 4M BHB/43mM M                         | 85 (78-91)    | 41 (34-47)    | 59 (52-65)    | 73 (66-80)    | 72 (65-79)    |         | T <.0001      |
| 4M BHB/20mM M                         | 80 (70-90)    | 40 (31-50)    | 44 (33-55)    | 66 (52-79)    | 67 (53-81)    |         | G*T<br>0.0091 |
| 4M BHB/10mM M                         | 92 (82-102)   | 35 (23-46)    | 62 (47-76)    | 64 (48-81)    | 96 (79-113)   |         |               |
| 4M BHB/4.3mM M                        | 88 (78-98)    | 34 (24-43)    | 48 (38-58)    | 65 (53-76)    | 66 (54-78)    |         |               |
| 4M BHB/0.43mM M                       | 95 (85-105)   | 44 (34-54)    | 48 (37-59)    | 67 (52-82)    | 59 (45-73)    |         |               |
| <b>Heart rate [beats/ min]</b>        |               |               |               |               |               |         |               |
| LR                                    | 120 (104-136) | 237 (222-253) | 175 (159-192) | 169 (152-186) | 158 (139-177) |         | G 0.0002      |
| 4M BHB/43mM M                         | 125 (108-142) | 198 (181-215) | 179 (161-196) | 151 (133-168) | 144 (126-161) |         | T <.0001      |
| 4M BHB/20mM M                         | 137 (111-163) | 254 (228-279) | 205 (176-234) | 217 (182-253) | 146 (110-183) |         | G*T<br>0.0015 |
| 4M BHB/10mM M                         | 135 (109-161) | 250 (220-279) | 197 (158-237) | 186 (142-230) | 153 (108-198) |         |               |
| 4M BHB/4.3mM M                        | 144 (118-170) | 218 (193-244) | 147 (120-174) | 153 (122-184) | 126 (94-158)  |         |               |
| 4M BHB/0.43mM M                       | 151 (125-177) | 264 (239-290) | 189 (160-219) | 198 (158-239) | 166 (130-202) |         |               |
| <b>Cardiac Output [l/min]</b>         |               |               |               |               |               |         |               |
| LR                                    | 2.9 (2.4-3.4) | 1.3 (0.9-1.8) | 2.9 (2.4-3.5) | 4.4 (3.9-5.0) | 4.3 (3.7-4.9) |         | G 0.0157      |
| 4M BHB/43mM M                         | 2.9 (2.4-3.4) | 1.7 (1.1-2.3) | 4.1 (3.6-4.7) | 5.1 (4.5-5.6) | 4.0 (3.5-4.6) |         | T <.0001      |
| 4M BHB/20mM M                         | 3.0 (2.3-3.8) | 1.5 (0.7-2.3) | 2.3 (1.3-3.3) | 4.2 (3.1-5.3) | 3.2 (2.1-4.3) |         | G*T<br>0.1389 |
| 4M BHB/10mM M                         | 3.2 (2.4-3.9) | 0.9 (0.1-1.8) | 2.3 (1.1-3.5) | 3.6 (2.3-5.0) | 3.8 (2.5-5.1) |         |               |
| 4M BHB/4.3mM M                        | 3.3 (2.5-4.1) | 1.4 (0.6-2.1) | 3.6 (2.7-4.5) | 4.6 (6.7-5.6) | 3.4 (2.4-4.3) |         |               |
| 4M BHB/0.43mM M                       | 4.0 (3.2-4.7) | 1.2 (0.4-1.9) | 2.5 (1.5-3.5) | 5.3 (4.0-6.6) | 4.5 (3.2-5.7) |         |               |
| <b>Urine Output [ml/hr]</b>           |               |               |               |               |               |         |               |
| LR                                    | 39 (-10-88)   | 18 (-31-66)   | 71 (20-122)   | 87 (35-140)   | 107 (47-168)  |         | G 0.0625      |
| 4M BHB/43mM M                         | 63 (11-114)   | 17 (-36-69)   | 132 (79-185)  | 152 (99-206)  | 140 (87-194)  |         | T <.0001      |
| 4M BHB/20mM M                         | 20 (-58-99)   | 18 (-61-97)   | 37 (-52-127)  | 72 (-36-180)  | 41 (-71-152)  |         | G*T<br>0.0911 |
| 4M BHB/10mM M                         | 92 (14-171)   | 5 (84-95)     | 45 (-74-164)  | 75 (-58-209)  | 89 (-47-226)  |         |               |

|                               |                     |                     |                                  |                              |                     |  |               |
|-------------------------------|---------------------|---------------------|----------------------------------|------------------------------|---------------------|--|---------------|
| 4M BHB/4.3mM M                | 51 (-28-129)        | 17 (-62-95)         | 155 (72-238)                     | 75 (-19-170)                 | 120 (24-216)        |  |               |
| 4M BHB/0.43mM M               | 67 (-12-145)        | 22 (-56-101)        | 38 (-51-128)                     | 200 (73-327)                 | 84 (-27-195)        |  |               |
| <b>Na<sup>+</sup> [mEq/l]</b> |                     |                     |                                  |                              |                     |  |               |
| LR                            | 139.0 (136.7-141.4) | 138.4 (136.0-140.7) | 139.5 (136.9-142.0)              | 137.7 (135.1-140.3)          | 142.1 (139.2-145.1) |  | G <.0001      |
| 4M BHB/43mM M                 | 139.2 (136.7-141.7) | 143.8 (141.2-146.4) | 145.6 (143.0-148.2)              | 148.2 (146.5-150.0)          | 142.9 (140.3-145.5) |  | T <.0001      |
| 4M BHB/20mM M                 | 140.5 (136.7-144.3) | 145.2 (141.3-149.0) | 147.7 (143.2-152.3)              | 150.2 (144.8-155.6)          | 144.0 (138.6-149.4) |  | G*T<br>0.4134 |
| 4M BHB/10mM M                 | 140.5 (136.7-144.3) | 144.3 (139.7-148.8) | 150.5 (144.2-156.9)              | 149.3 (142.7-156.0)          | 152.5 (145.9-159.1) |  |               |
| 4M BHB/4.3mM M                | 142.8 (139.0-146.7) | 144.3 (140.5-148.2) | 146.8 (142.7-151.0)              | 148.9 (144.2-153.6)          | 146.0 (141.3-150.7) |  |               |
| 4M BHB/0.43mM M               | 140.7 (136.8-144.5) | 145.0 (141.2-148.8) | 148.1 (143.0-153.2)              | 149.8 (143.3-156.4)          | 144.3 (138.9-149.8) |  |               |
| <b>K<sup>+</sup> [mEq/l]</b>  |                     |                     |                                  |                              |                     |  |               |
| LR                            | 3.9 (3.7-4.2)       | 5.8 (5.6-6.1) #     | 3.9 (3.7-4.2) #                  | 4.3 (4.1-4.6) #              | 3.3 (3.0-3.6)       |  | G <.0001      |
| 4M BHB/43mM M                 | 4.0 (3.7-4.2)       | 4.6 (4.3-4.8) *     | 3.0 (2.7-3.3) * <sup>△</sup>     | 3.2 (2.9-3.4) * <sup>○</sup> | 3.3 (3.0-3.5)       |  | T <.0001      |
| 4M BHB/20mM M                 | 3.8 (3.4-4.2)       | 5.0 (4.6-5.4)       | 4.4 (4.0-4.9) #                  | 3.6 (3.0-4.1)                | 3.0 (2.5-3.6)       |  | G*T<br><.0001 |
| 4M BHB/10mM M                 | 3.8 (3.4-4.2)       | 5.5 (5.0-6.0)       | 3.1 (2.4-3.7)                    | 3.2 (2.6-3.9)                | 2.6 (1.9-3.3)       |  |               |
| 4M BHB/4.3mM M                | 3.8 (3.4-4.2)       | 5.0 (4.6-5.4)       | 3.0 (2.6-3.4)                    | 3.0 (2.6-3.5) *              | 3.5 (3.0-3.9)       |  |               |
| 4M BHB/0.43mM M               | 4.0 (3.6-4.4)       | 5.7 (5.3-6.0)       | 3.5 (3.0-4.1)                    | 3.0 (2.4-3.7)                | 3.0 (2.5-3.6)       |  |               |
| <b>pH</b>                     |                     |                     |                                  |                              |                     |  |               |
| LR                            | 7.47 (7.43-7.50)    | 7.39 (7.35-7.42)    | 7.28 (7.25-7.32) <sup>○•</sup>   | 7.38 (7.34-7.41) #           | 7.42 (7.38-7.46)    |  | G <.0001      |
| 4M BHB/43mM M                 | 7.45 (7.42-7.49)    | 7.44 (7.40-7.47)    | 7.38 (7.34-7.41) •               | 7.50 (7.47-7.54) *           | 7.48 (7.44-7.51)    |  | T <.0001      |
| 4M BHB/20mM M                 | 7.46 (7.40-7.51)    | 7.39 (7.33-7.45)    | 7.25 (7.18-7.31)                 | 7.36 (7.29-7.44)             | 7.49 (7.41-7.57)    |  | G*T<br><.0001 |
| 4M BHB/10mM M                 | 7.47 (7.41-7.53)    | 7.39 (7.33-7.45)    | 7.28 (7.20-7.36)                 | 7.43 (7.34-7.53)             | 7.45 (7.36-7.55)    |  |               |
| 4M BHB/4.3mM M                | 7.48 (7.42-7.53)    | 7.44 (7.39-7.50)    | 7.44 (7.38-7.50) *•              | 7.51 (7.45-7.58)             | 7.39 (7.32-7.46)    |  |               |
| 4M BHB/0.43mM M               | 7.45 (7.39-7.51)    | 7.43 (7.37-7.48)    | 7.07 (7.01-7.14) *# <sup>○</sup> | 7.29 (7.20-7.37)             | 7.36 (7.28-7.43)    |  |               |

| <b>Hgb [g/dl]</b>                   |                  |                   |                   |                   |                                        |                                           |               |
|-------------------------------------|------------------|-------------------|-------------------|-------------------|----------------------------------------|-------------------------------------------|---------------|
| LR                                  | 8.7 (8.4-9.0)    | 7.0 (6.6-7.3)     | 5.2 (4.8-5.5)     | 6.1 (5.7-6.4)     | 5.7 (5.3-6.1)                          |                                           | G 0.014       |
| 4M BHB/43mM M                       | 8.6 (8.2-8.9)    | 6.1 (5.8-6.4)     | 5.0 (4.6-5.3)     | 6.0 (5.7-6.4)     | 5.6 (5.3-6.0)                          |                                           | T <.0001      |
| 4M BHB/20mM M                       | 8.6 (8.0-9.1)    | 6.3 (5.8-6.8)     | 5.6 (5.0-6.2)     | 6.4 (5.7-7.1)     | 6.1 (5.4-6.8)                          |                                           | G*T<br>0.1014 |
| 4M BHB/10mM M                       | 8.7 (8.1-9.2)    | 5.9 (5.3-6.5)     | 5.3 (4.5-6.1)     | 6.5 (5.6-7.4)     | 6.7 (5.8-7.5)                          |                                           |               |
| 4M BHB/4.3mM M                      | 8.9 (8.3-9.4)    | 6.5 (5.9-7.0)     | 5.2 (4.5-5.9)     | 6.1 (5.4-6.7)     | 6.0 (5.3-6.6)                          |                                           |               |
| 4M BHB/0.43mM M                     | 8.6 (8.0-9.1)    | 6.9 (6.4-7.4)     | 4.5 (3.7-5.2)     | 5.9 (5.1-6.7)     | 5.7 (5.0-6.4)                          |                                           |               |
| <b>Blood urea nitrogen [mg/dl]</b>  |                  |                   |                   |                   |                                        |                                           |               |
| LR                                  | 13.6 (0.6-26.6)  | 11.3 (-2.1-24.8)  | 10.6 (-2.8-24.0)  | 12.8 (-2.2-27.9)  | 31.5 (15.8-47.2)                       | 16.0 (-20.8-52.8) <sup>△</sup>            | G 0.0095      |
| 4M BHB/43mM M                       | 9.5 (-4.4-23.4)  | 11.9 (-2.5-26.4)  | 10.8 (-4.3-25.8)  | 12.6 (-1.8-27.1)  | 14.4 (-0.1-28.8)                       | 13.0 (-13.0-39) <sup>△</sup>              | T 0.0992      |
| 4M BHB/20mM M                       | 8.8 (-12.4-30.1) | 11.2 (-12.1-34.5) | 12.3 (-13.8-38.3) | 15.0 (-15.1-45.1) | 17.7 (-12.4-47.7)                      | 207.0 (176.9-237.1)<br>*# <sup>▲</sup> ◦• | G*T<br><.0001 |
| 4M BHB/10mM M                       | 9.8 (-11.4-31.1) | 11.8 (-14.3-37.8) | 8.0 (-28.8-44.8)  | 9.0 (-27.8-45.8)  | 12.5 (-24.3-49.3)                      | 8.0 (-28.8-44.8) <sup>△</sup>             |               |
| 4M BHB/4.3mM M                      | 8.3 (-12.9-29.6) | 11.6 (-11.7-34.9) | 9.6 (-13.7-32.9)  | 11.8 (-14.3-37.8) | 11.8 (-14.3-37.8)                      | 16.0 (-14.1-46.1) <sup>△</sup>            |               |
| 4M BHB/0.43mM M                     | 9.5 (-11.8-30.8) | 11.7 (9.6-32.9)   | 8.5 (-17.5-34.5)  | 10.7 (-19.4-40.7) | 11.3 (-18.7-41.4)                      | 11.0 (-41.1-63.1) <sup>△</sup>            |               |
| <b>Lactate dehydrogenase [U/dl]</b> |                  |                   |                   |                   |                                        |                                           |               |
| LR                                  | 1122 (518-1725)  | 1320 (715-1924)   | 1406 (801-2011)   | 1882 (1267-2497)  | 2801 (2132-3469) •                     | 3279 (2524-4035) •                        | G 0.0005      |
| 4M BHB/43mM M                       | 1098 (453-1744)  | 1168 (521-1816)   | 1445 (795-2095)   | 2431 (1779-3083)  | 3065 (2399-3731) •                     | 4563 (3876-5259) <sup>△</sup>             | T <.0001      |
| 4M BHB/20mM M                       | 560 (-426-1546)  | 589 (-401-1580)   | 908 (-97-1913)    | 1296 (226-2366)   | 1480 (153-2807) •                      | 1307 (-25-2639) <sup>#</sup> •            | G*T<br><.0001 |
| 4M BHB/10mM M                       | 501 (-485-1487)  | 638 (-384-1660)   | 854 (-234-1943)   | 877 (-366-2120)   | 1457 (-148-3062) •                     | 1294 (-385-2973) •                        |               |
| 4M BHB/4.3mM M                      | 1266 (280-2252)  | 1630 (637-2623)   | 1659 (659-2659)   | 2630 (1597-3662)  | 2863 (1693-4033) •                     | 3579 (2391-4767) •                        |               |
| 4M BHB/0.43mM M                     | 1452 (465-2438)  | 1551 (565-2537)   | 1983 (978-2987)   | 3170 (2101-4239)  | 7857 (6530-9184)<br>*# <sup>▲</sup> ◦• | 7681 (6244-9118) * <sup>▲</sup> ◦•        |               |

**Supplemental Table. Physiologic Parameters and Markers of Organ Function in Pigs Exposed to Hemorrhagic Shock, Injury and Resuscitation.** Data are presented as least-squared means (95% confidence interval). \* p<0.05 vs LR, # p<0.05 vs 4M BHB/43mM M, <sup>△</sup> p<0.05 vs 4M BHB/20mM M, <sup>▲</sup> p<0.05 vs 4M BHB/10mM M, <sup>◦</sup> p<0.05 vs 4M BHB/4.3mM M, • p<0.05 vs 4M BHB/0.43mM M. BHB - D-β-hydroxybutyrate, BUN – blood urea nitrogen, G - group effect, G\*T - group \* time interaction effect, FR - full resuscitation, LDH – lactate dehydrogenase, LR lactated Ringer’s solution, M – melatonin, PR - post resuscitation, R - limited resuscitation, S 45min – end of shock period, T - time effect.
