# Supplementary material for: d-β-Hydroxybutyrate and melatonin for treatment of porcine hemorrhagic shock and injury: a melatonin dose-ranging study
Source: PubMed Central journal article supplement (PMC5707828; doi:10.1186/s13104-017-2975-0), 2017-11-29
Supplement: 13104_2017_2975_MOESM3_ESM.pdf [file 13104_2017_2975_MOESM3_ESM.pdf]

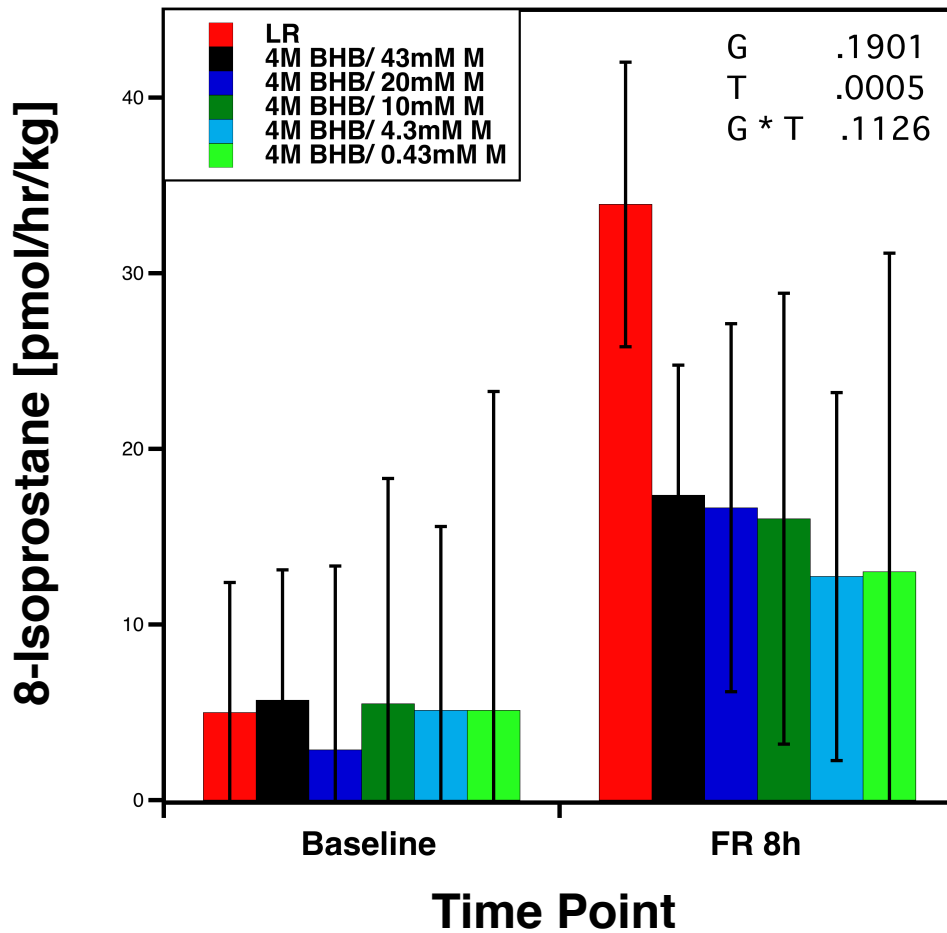

**Supplemental Figure 2. Urine 8-Isoprostane levels during hemorrhagic shock and injury.** Data are presented as least-squares means with 95% confidence intervals. BHB - D-β-hydroxybutyrate, FR - full resuscitation, G - Group effect, G\*T - Group \* Time interaction effect, LR - lactated Ringer's solution, M - melatonin, T - Time effect.
